# Supplementary material
Source: publisher figshare collection journal article supplement (https://tandf.figshare.com/articles/dataset/_/10275110)

Supplementary material for the paper

Kolari, T. H. M. et al. Reindeer grazing controls willows but has only minor effects on plant communities in Fennoscandian oroarctic mires. *Arctic, Antarctic, and Alpine Research*.

Appendix 5. a) The difference in *S. lapponum* abundance between the exclosures and grazed areas is slightly visible in orthoimages taken in 2016. b) The difference in willow height can be seen also in digital elevation models derived from orthomosaics. c) One of the exclosures, where willows are more abundant and higher compared to the surrounding area 13 years after the building.

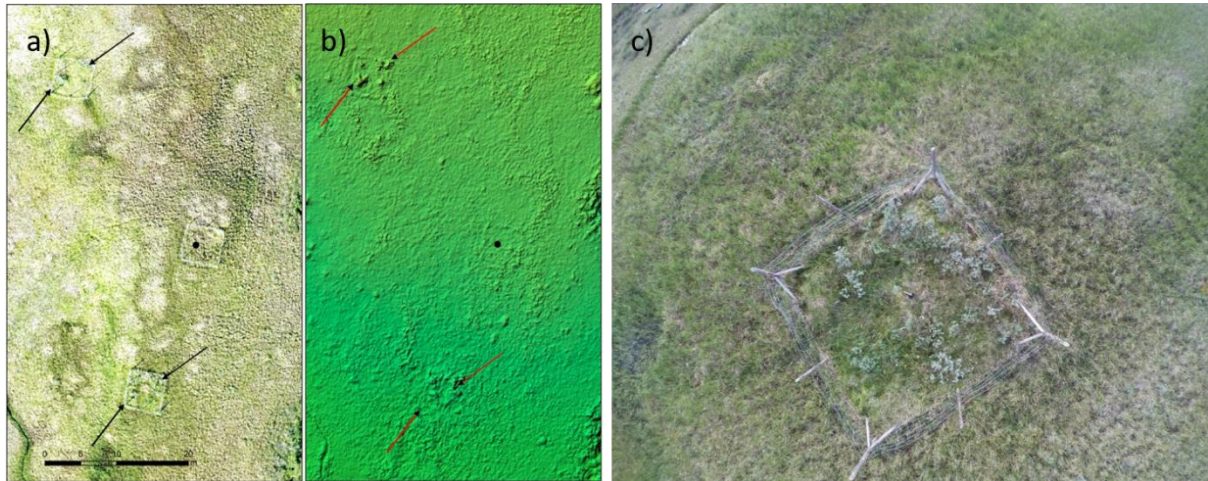

Supplement: Supplementary file 1 [file 1]
