# Supplementary material
Source: publisher figshare collection journal article supplement (https://tandf.figshare.com/articles/dataset/_/10275110)
Supplement: Supplementary file 2 [file 1]

Supplementary material for the paper

Kolari, T. H. M. et al. Reindeer grazing controls willows but has only minor effects on plant communities in Fennoscandian oroarctic mires. *Arctic, Antarctic, and Alpine Research*.

Appendix 1. Table of data availability and quality between separate tests.

| Test                                                    | 2002                                                | 2006                                                                       | 2015                                                                       | 2016 |
|---------------------------------------------------------|-----------------------------------------------------|----------------------------------------------------------------------------|----------------------------------------------------------------------------|------|
| <b>NMDS*</b>                                            | Exclosure <i>n</i> = 60<br>Non-grazed <i>n</i> = 60 | .                                                                          | Grazed <i>n</i> = 45, Exclosure <i>n</i> = 45<br>Non-grazed <i>n</i> = 27  | .    |
| <b>PERMANOVA*</b>                                       | .                                                   | .                                                                          | Grazed <i>n</i> = 45, Exclosure <i>n</i> = 45                              | .    |
| <b>Linear mixed effect models**</b>                     |                                                     |                                                                            |                                                                            |      |
| <i>Salix</i> ssp. abundance over time                   | Exclosure <i>n</i> = 15<br>Non-grazed <i>n</i> = 15 | Grazed <i>n</i> = 12, Exclosure <i>n</i> = 12,<br>Non-grazed <i>n</i> = 12 | Grazed <i>n</i> = 15, Exclosure <i>n</i> = 15,<br>Non-grazed <i>n</i> = 9  | .    |
| <i>Salix lapponum</i> height over time                  | Exclosure <i>n</i> = 15<br>Non-grazed <i>n</i> = 15 | Grazed <i>n</i> = 12, Exclosure <i>n</i> = 12,<br>Non-grazed <i>n</i> = 12 | Grazed <i>n</i> = 15, Exclosure <i>n</i> = 15,<br>Non-grazed <i>n</i> = 15 | .    |
| Abundance estimates of plant groups                     | .                                                   | .                                                                          | Grazed <i>n</i> = 15, Exclosure <i>n</i> = 15,<br>Non-grazed <i>n</i> = 9  | .    |
| <i>S. lapponum</i> height (cm)                          | .                                                   | .                                                                          | Grazed <i>n</i> = 15, Exclosure <i>n</i> = 15,<br>Non-grazed <i>n</i> = 15 | .    |
| <i>S. lapponum</i> leaf area (mm <sup>2</sup> )         | .                                                   | .                                                                          | Grazed <i>n</i> = 15, Exclosure <i>n</i> = 15<br>Non-grazed <i>n</i> = 15  | .    |
| <i>S. lapponum</i> leaf N-concentration (% of dry mass) | .                                                   | .                                                                          | Grazed <i>n</i> = 15, Exclosure <i>n</i> = 15,<br>Non-grazed <i>n</i> = 15 | .    |
| Number of fertile female willow plants                  | .                                                   | .                                                                          | Grazed <i>n</i> = 15, Exclosure <i>n</i> = 15,<br>Non-grazed <i>n</i> = 15 | .    |
| Number of flowering female catkins                      | .                                                   | .                                                                          | Grazed <i>n</i> = 15, Exclosure <i>n</i> = 15,<br>Non-grazed <i>n</i> = 15 | .    |

|                                                                        |   |   |                                                               |                                       |
|------------------------------------------------------------------------|---|---|---------------------------------------------------------------|---------------------------------------|
| Catkin dry weight (g)                                                  | . | . | Grazed $n = 15$ , Exclosure $n = 15$ ,<br>Non-grazed $n = 15$ | .                                     |
| Normalized Difference Vegetation Index<br>(NDVI)                       | . | . | Grazed $n = 15$<br>Exclosure $n = 15$<br>Non-grazed $n = 15$  | .                                     |
| Leaf area index (LAI)                                                  | . | . | .                                                             | Grazed $n = 15$<br>Exclosure $n = 15$ |
| <hr/>                                                                  |   |   |                                                               |                                       |
| * $n = 0.25\text{ m}^2$ subplots    ** $n = 5 \times 5\text{ m}$ plots |   |   |                                                               |                                       |
