# Supplementary material
Source: publisher figshare collection journal article supplement (https://tandf.figshare.com/articles/dataset/_/10275110)
Supplement: Supplementary file 3 [file 1]

Supplementary material for the paper

Kolari, T. H. M. et al. Reindeer grazing controls willows but has only minor effects on plant communities in Fennoscandian oroarctic mires. *Arctic, Antarctic, and Alpine Research*.

Appendix 2. List of species weighted average scores in the NMDS ordination. Nomenclature follows Hämet-Ahti et al. (1998) for vascular plants and Laaka-Lindberg et al. (2009) for bryophytes

| Species                                           | NMDS 1   | NMDS 2   |
|---------------------------------------------------|----------|----------|
| Vascular plants                                   | 0.23501  | -0.44891 |
| <i>Andromeda polifolia</i>                        | 0.20407  | -0.14189 |
| <i>Betula nana</i>                                | -0.90922 | 0.39872  |
| <i>Bistorta vivipara</i>                          | -0.52627 | 0.40472  |
| <i>Calamagrostis canescens</i>                    | -0.2056  | 1.37035  |
| <i>Calamagrostis lapponica</i>                    | -0.1205  | 0.83072  |
| <i>Calamagrostis stricta</i>                      | 0.12064  | 0.3776   |
| <i>Carex aquatilis</i>                            | 0.16533  | 0.44804  |
| <i>Carex canescens</i>                            | 0.32511  | 0.04586  |
| <i>Carex limosa</i> coll.                         | -0.70829 | -0.42458 |
| <i>Carex rostrata</i>                             | 0.43886  | -0.41805 |
| <i>Carex rotundata</i>                            | 1.05047  | -0.19956 |
| <i>Carex vaginata</i>                             | -0.78895 | 0.7615   |
| <i>Carex vesicaria</i>                            | 1.0717   | 0.05815  |
| <i>Empetrum nigrum</i> ssp. <i>hermaphroditum</i> | -0.32885 | 0.92778  |
| <i>Epilobium palustre</i>                         | -0.9486  | 0.7199   |
| <i>Equisetum arvense</i>                          | -0.49007 | -0.26334 |
| <i>Equisetum palustre</i>                         | -0.29485 | 0.48361  |
| <i>Equisetum sylvestris</i>                       | 0.46007  | -0.50346 |
| <i>Eriophorum angustifolium</i>                   | 1.15664  | 0.01753  |
| <i>Eriophorum vaginatum</i>                       | 0.21407  | 1.15614  |
| <i>Galium</i> spp.                                | 0.72498  | -0.88806 |
| <i>Juncus filiformis</i>                          | 1.0967   | 1.24662  |
| <i>Parnassia palustris</i>                        | -0.39179 | -1.90029 |
| <i>Pedicularis palustris</i>                      | 0.36422  | 1.32705  |
| <i>Phyllodoce caerulea</i>                        | 0.95123  | 1.34456  |
| <i>Pinguicula vulgaris</i>                        | 0.7794   | 1.39903  |
| <i>Potentilla palustris</i>                       | -0.98245 | 0.35852  |
| <i>Pyrola</i> sp.                                 | 0.86629  | 0.6941   |
| <i>Rubus chamaemorus</i>                          | 0.51924  | 0.61105  |
| <i>Salix glauca</i>                               | -0.34943 | 0.18301  |
| <i>Salix lapponum</i>                             | 0.95123  | 1.34456  |
| <i>Salix myrsinifolia</i>                         | 0.28471  | 1.20958  |
| <i>Salix phylicifolia</i>                         | 0.2335   | -1.0181  |
| <i>Trichophorum cespitosum</i>                    | 0.65719  | 1.36725  |
| <i>Trientalis europaea</i>                        | 0.36876  | -0.67767 |
| <i>Vaccinium microcarpum</i>                      | 0.00105  | -0.05714 |
| <i>Vaccinium myrtillus</i>                        | 0.22424  | -0.56494 |
| <i>Vaccinium oxycoccos</i>                        | 1.041    | -0.13571 |
| <i>Vaccinium uliginosum</i>                       | 0.52195  | 0.09007  |

|                              |         |         |
|------------------------------|---------|---------|
| <i>Vaccinium vitis-idaea</i> | 0.95123 | 1.34456 |
| <i>Vahlodea atropurpurea</i> | -0.021  | 1.24994 |
| <i>Viola</i> sp.             |         |         |

#### Bryophytes

|                                     |          |           |
|-------------------------------------|----------|-----------|
| <i>Aneura pinguis</i>               | 0.12062  | 1.47018   |
| <i>Aulacomnium palustre</i>         | 0.70378  | 0.97897   |
| <i>Bryum</i> spp.                   | 0.11611  | 0.84842   |
| <i>Calliergon cordifolium</i>       | 0.48798  | -0.28381  |
| <i>Dicranum</i> spp.                | 0.76528  | 0.34326   |
| Hepaticae                           | -0.03    | 3 0.49762 |
| <i>Hylocomnium splendens</i>        | -0.39179 | -1.90029  |
| <i>Loeskygnum badium</i>            | 0.47751  | -0.11951  |
| <i>Marchantia polymorpha</i>        | -0.41569 | 1.42676   |
| <i>Meesia uliginosa</i>             | 0.65719  | 1.36725   |
| Mniaceae                            | 0.31945  | 0.38678   |
| <i>Oncophorus</i> sp.               | -0.06829 | 0.57268   |
| <i>Paludella squarrosa</i>          | -0.32892 | 0.27896   |
| <i>Pleurozium schreberi</i>         | -0.56917 | 0.17137   |
| <i>Pohlia nutans</i>                | 0.40826  | 0.84191   |
| <i>Polytrichum</i> spp.             | 0.6753   | 5 0.68806 |
| <i>Ptilidium ciliare</i>            | -0.47804 | 1.05442   |
| <i>Sanionia unciata</i>             | -0.63539 | -0.11296  |
| <i>Scorpidium revolvens</i>         | 0.432    | -0.37279  |
| <i>Sphagnum balticum</i>            | 0.09528  | 0.40923   |
| <i>Sphagnum capillifolium</i>       | -0.23816 | -1.56888  |
| <i>Sphagnum compactum</i>           | 0.4604   | -0.96574  |
| <i>Sphagnum fallax</i>              | -0.4282  | 0.53924   |
| <i>Sphagnum fimbriatum</i>          | 0.5536   | 0.08594   |
| <i>Sphagnum jensenii</i>            | 0.19893  | -0.3072   |
| <i>Sphagnum limdborgii</i>          | 0.42217  | 0.14177   |
| <i>Sphagnum papillosum</i>          | -0.96299 | -0.75495  |
| <i>Sphagnum platyphyllum</i>        | -0.56789 | 0.99596   |
| <i>Sphagnum riparium</i>            | -0.78525 | 0.04036   |
| <i>Sphagnum russowii</i>            | 0.37125  | 0.34461   |
| <i>Sphagnum teres</i>               | -0.48382 | -0.15367  |
| <i>Sphagnum warnstorffii</i>        | 0.97887  | 0.56702   |
| <i>Straminergon stramineum</i>      | -0.24173 | 0.0778    |
| <i>Warnstorffia</i> sp.             | 0.33283  | -0.11082  |
| <i>Warnstorffia pseudostraminea</i> | -0.99755 | 0.27079   |
| <i>Warnstorffia sarmentosa</i>      | -0.03969 | -0.54591  |
| <i>Warnstorffia tundrae</i>         | -0.99755 | 0.27079   |

#### References:

Hämet-Ahti, L., Suominen, J., Ulvinen, T. & Uotila, P. (eds.) (1998). Retkeilykasvio [Field Flora of Finland], 4<sup>th</sup> ed. Helsinki, Finland: Finnish Museum of Natural History, Botanical Museum  
 Laaka-Lindberg, S., Anttila, S., & Syrjänen, K. (eds.). (2009) Suomen uhanalaiset sammalet [Threatened bryophytes of Finland], 1<sup>st</sup> ed. Helsinki, Finland: Finnish Environment Institute.
