# Supplementary material
Source: publisher figshare collection journal article supplement (https://tandf.figshare.com/articles/dataset/_/10275110)

#### APPENDIX 4. Compilation of average scores of different grazing treatment plots in two-dimensional NMDS ordination, based on Wisconsin transformed subplot-level vegetation data from 2002 and 2015.

In this version of the NMDS ordination graph, movement in time is presented for the five enclosure sites (FIN) and for three non-grazed sites (NOR) between 2002 and 2015. In addition, sites only sampled in 2015 are shown. All site scores here are average scores (centroids) of three plots. Change in time is of special interest in any work with repeated sampling and we scrutinized in detail the plant community changes in time. However, we could not find any recognizable pattern of change, instead, individual sites moved in different directions. Despite the evident effects in e.g. total cover of bryophytes and willows, reindeer grazing did not affect plant community composition as a whole.

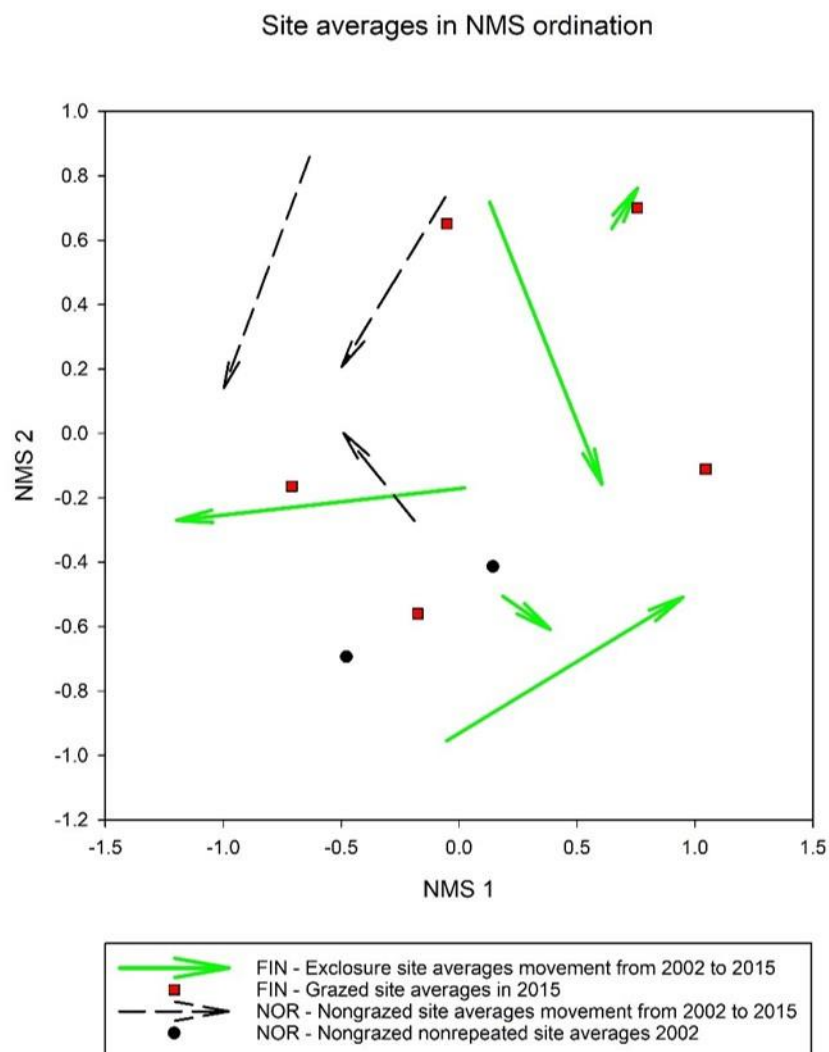

Supplement: Supplementary file 4 [file 1]
