# Supplementary material
Source: publisher figshare collection journal article supplement (https://tandf.figshare.com/articles/dataset/_/10275110)
Supplement: Supplementary file 5 [file 1]

Supplementary material to the paper

Kolari, T. H. M. et al. Reindeer grazing controls willows but has only minor effects on plant communities in Fennoscandian oro-arctic mires. *Arctic, Antarctic, and Alpine Research*.

Appendix 3. Abundances of selected vascular plant and moss species in two-dimensional NMDS ordination (Figs 1-10).

The graphics in this appendix all repeat the same NMDS ordination overlaid with abundance (Wisconsin double-transformed) of selected species. The Finnish grazing treatments and Norwegian samples are presented with different symbols. Although the NMDS did not separate grazing treatments, there was a clear gradient structure. Towards the lower right corner, abundance of poorly minerotrophic wet habitat species (*Carex rotundata*, *Eriophorum angustifolium*) grows and bog hummock species (*Aulacomnium palustre*) grows towards upper right corner. To the left, more strongly minerotrophic species (*Sphagnum teres*, *Straminergon stramineum*) increase and a marked separation between *C. rostrata* and *C. rotundata* and *E. angustifolium* dominated wet fen plots is found. In summary, although apparently similar mire sites were selected in the study, some compositional turnover is evident in plant communities, but it is not clearly connected to the largely overlapping grazing treatments.

Three sample groups in the following two-dimensional NMDS ordinations are:

- 1 = Free grazing - Finland
- 2 = Exclosures - Finland
- 3 = No grazing - Norway

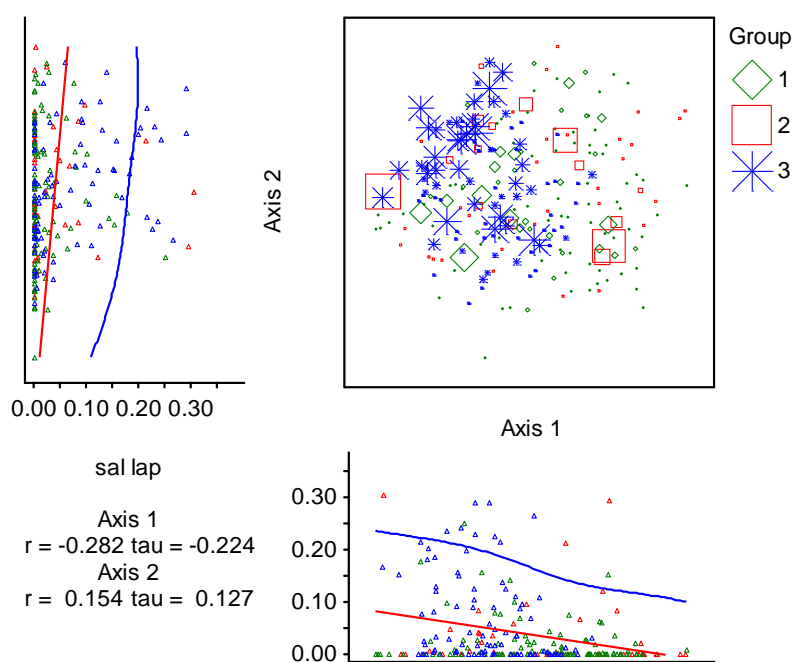

**Figure 1** Abundance of *Salix lapponum* in the 2-D NMDS ordination.

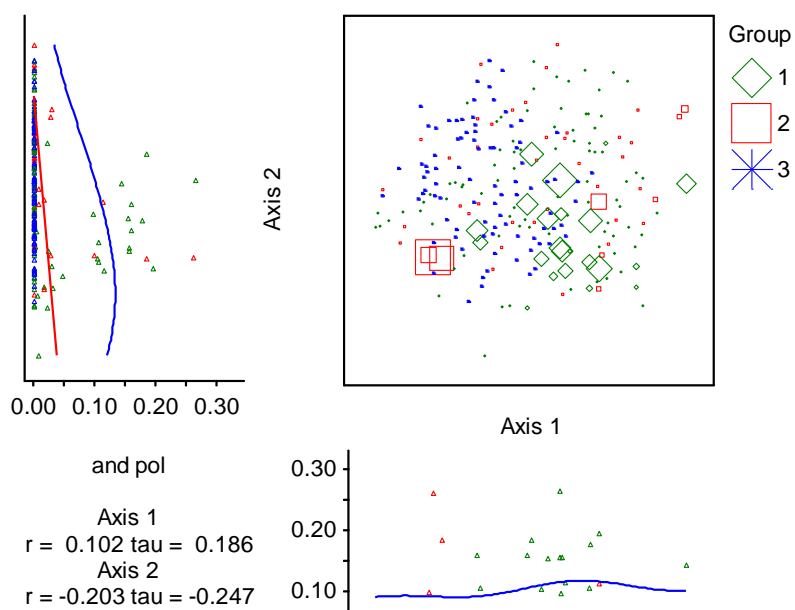

**Figure 2** Abundance of *Andromeda polifolia* in the 2-D NMDS ordination.

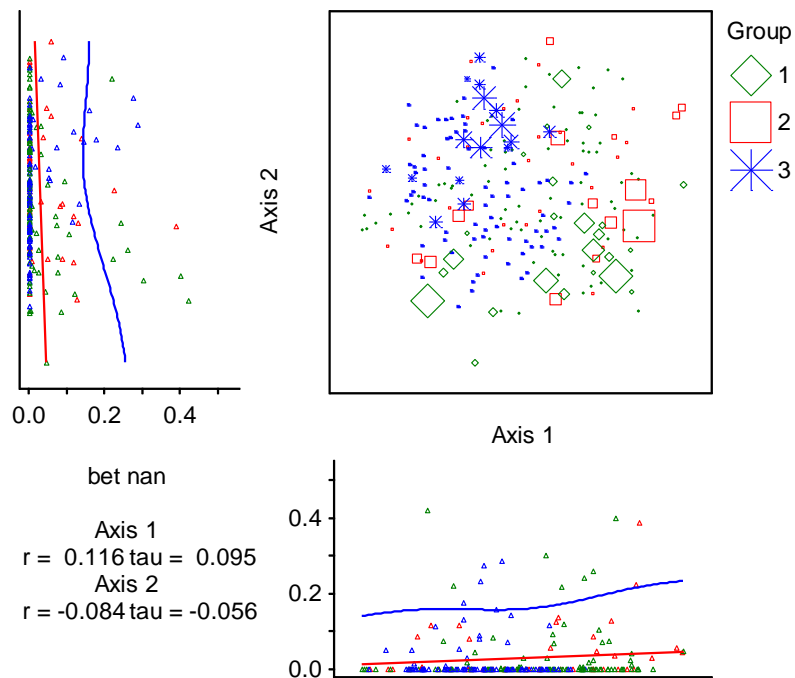

**Figure 3** Abundance of *Betula nana* in the 2-D NMDS ordination.

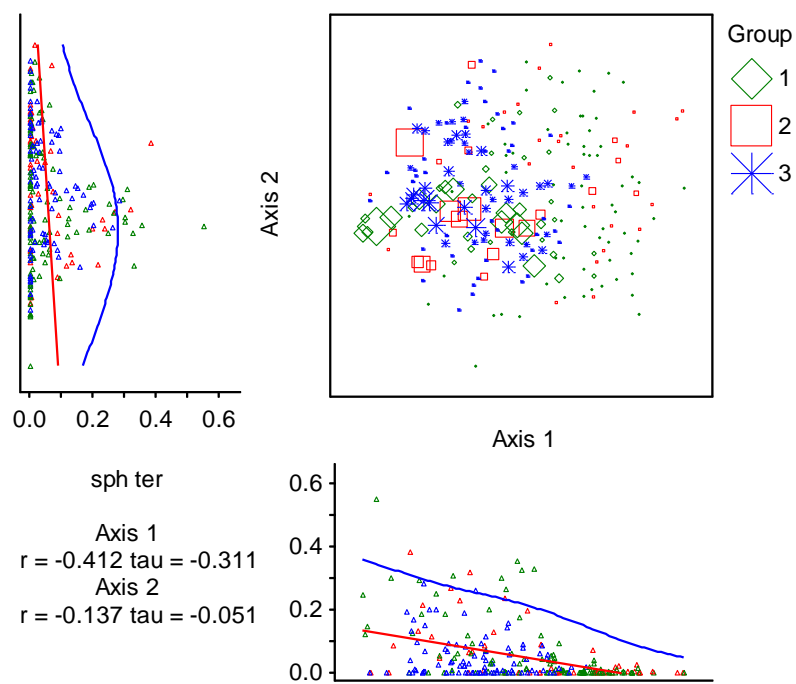

**Figure 4** Abundance of *Sphagnum teres* in the 2-D NMDS ordination.

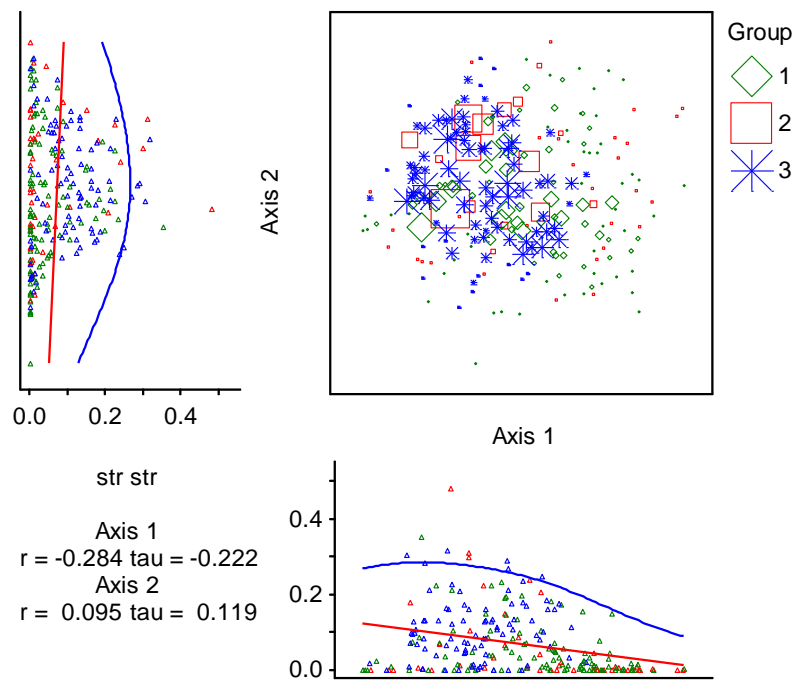

**Figure 5** Abundance of *Straminergon stramineum* in the 2-D NMDS ordination.

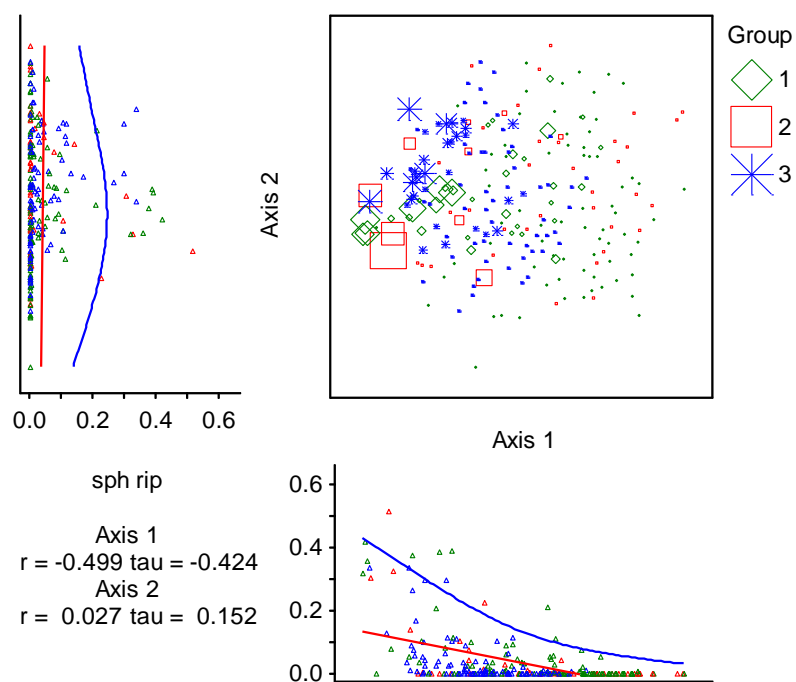

**Figure 6** Abundance of *Sphagnum riparium* in the 2-D NMDS ordination.

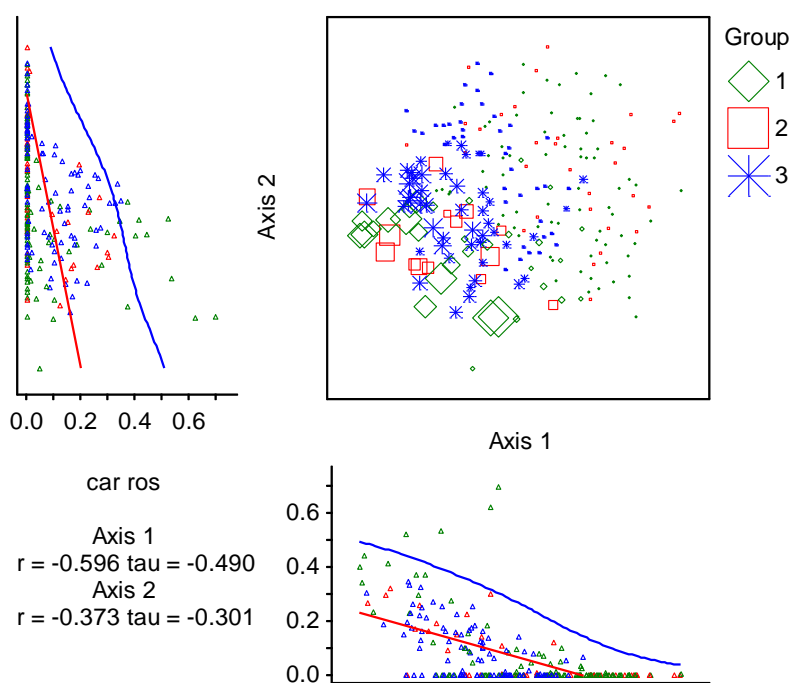

**Figure 7** Abundance of *Carex rostrata* in the 2-D NMDS ordination.

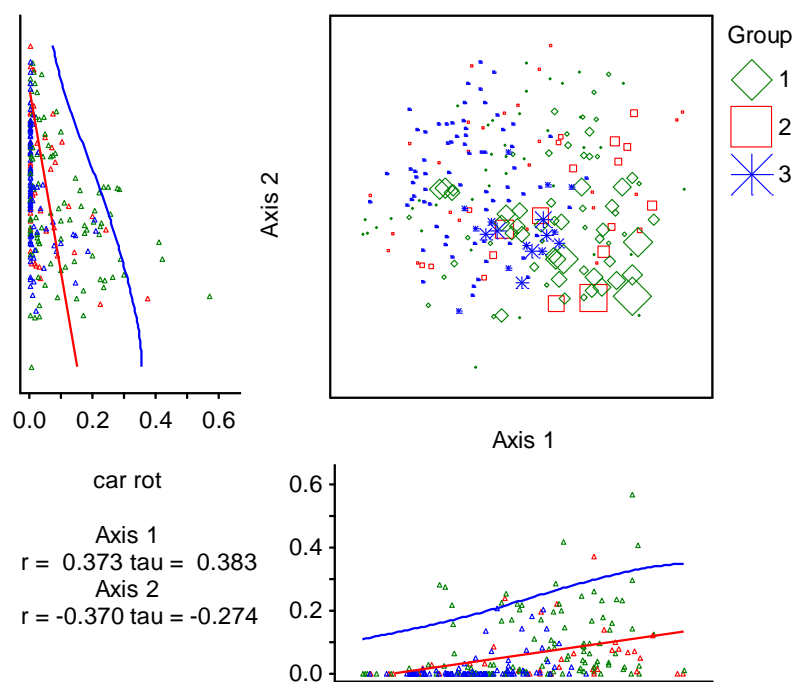

**Figure 8** Abundance of *Carex rotundata* in the 2-D NMDS ordination.

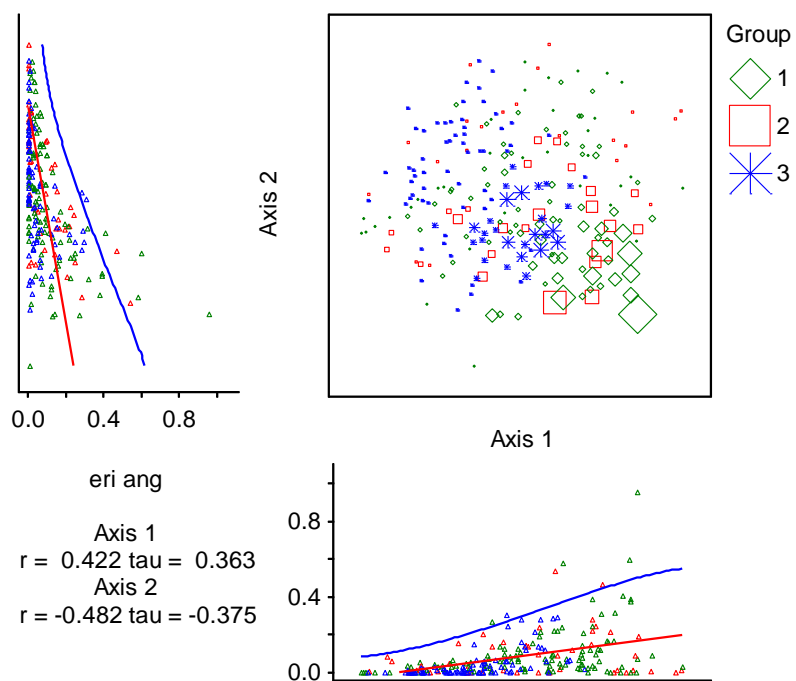

**Figure 9** Abundance of *Eriophorum angustifolium* in the 2-D NMDS ordination.

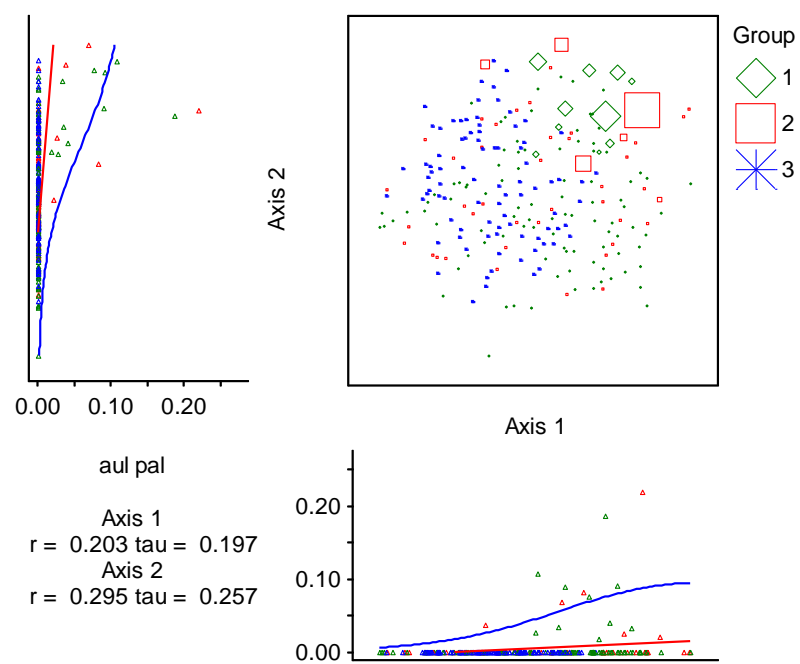

**Figure 10** Abundance of *Aulacomnium palustre* in the 2-D NMDS ordination.
